# Supplementary material
Source: publisher site journal article supplement (https://www.dovepress.com/get_supplementary_file.php?f=344343.docx)
Supplement: Supplementary file 1 [file get_supplementary_file.php]

Table S1. Detailed disease progression sites.

| Site | Total  (n =18) |
| --- | --- |
| Cervicothoracic lymph node | 7 (38.9%) |
| Lung | 6 (33.3%) |
| Pleural dissemination | 2 (11.1%) |
| Bone metastases | 2 (11.1%) |
| Brain metastases | 1 (5.6%) |

Table S2. Correlation between PD-L1 expression and pathologic responses.

|  | PD-L1 positive*  (n =30) | PD-L1 negative#  (n =16) | *P*-value |
| --- | --- | --- | --- |
| Radiologic responses |  |  | 0.072 |
| Complete response | 2 (6.7%) | 0 |  |
| Partial response | 20 (66.7%) | 6 (37.5%) |  |
| Stable disease | 8 (26.7%) | 9 (56.3%) |  |
| Progression disease | 0 | 1 (6.3%) |  |
| Pathologic responses |  |  | 0.974 |
| Incomplete pathological response | 9 (30.0%) | 5 (31.3%) |  |
| Major pathological response | 5 (16.7%) | 3 (18.8%) |  |
| Complete pathological response | 16 (53.3%) | 8 (50.0%) |  |

*Defined as PD-L1 expression of 1% or more. #Defined as PD-L1 expression of less than 1%.

Table S3. Comparison with previous studies on induction ICI for NSCLC.

| Authors | Year | Country | Method | Size | Drug | Histology | Stage | pCR | MPR |
| --- | --- | --- | --- | --- | --- | --- | --- | --- | --- |
| Chen et al. (17) | 2021 | China | Retrospective | 12 | NV, PB or plus chemo | 5 ADC,  6 SCC,  1 other | IIIA-IIIB | 42% | 33% |
| Huang et al. (18) | 2021 | China | Retrospective | 25 | NV | 13 ADC, 8 SCC, 3 other | IIIA | 4% | 38% |
| Duan et al. (19) | 2021 | China | Retrospective | 23 | NV, SL, PB or plus chemo | 4 ADC, 19 SCC | IIA–IIIB | 30% | 50% |
| Gao et al. (15) | 2020 | China | Prospective | 40 | SL | 6 ADC, 33 SCC, 1 other | IA-IIIB | 16% | 41% |
| Shu at al. (26) | 2020 | USA | Prospective | 30 | AZ plus chemo | 17 ADC, 12 SCC, 1 other | IIA-IIIA | 33% | 57% |
| Provencio et al. (16) | 2020 | Spain | Prospective | 46 | NV plus chemo | 26 ADC, 16 SCC, 4 other | IIB-IIIB | 63% | 20% |
| Bott et al. (23) | 2019 | USA | Prospective | 21 | NV | 14 ADC, 5 SCC, 2 other | IA-IIIA | 10% | 45% |
| Forde at al. (14) | 2018 | USA | Prospective | 21 | NV | 13 ADC, 6SCC, 2 other | I-IIIA | 15% | 45% |

Abbreviations: NV, nivolumab; PB, pembrolizumab; SL, sintilimab; AZ, atezolizumab; ADC: adenocarcinoma; SCC: squamous cell carcinoma; pCR, pathological complete response; MPR, major pathological response.
